# Supplementary material for: Mild Phenotypes of Gyrate Atrophy in a Carrier with One Variant Allele of <em>OAT</em>
Source: Preprints.org preprint supplement (doi:10.20944/preprints202404.1957.v1), 2024-04-30
Supplement: Supplementary file 2 [file Supplementary_Materials.docx]

**Supplementary Materials**

**Supplementary Figure 1. Anterior segment photographs of F-II1 (right eye).** Following mydriasis, the anterior segment photograph of the right eye was captured using a photographic system (Keeler, Windsor, UK). Red arrows corresponded to punctate posterior capsular opacification.

**
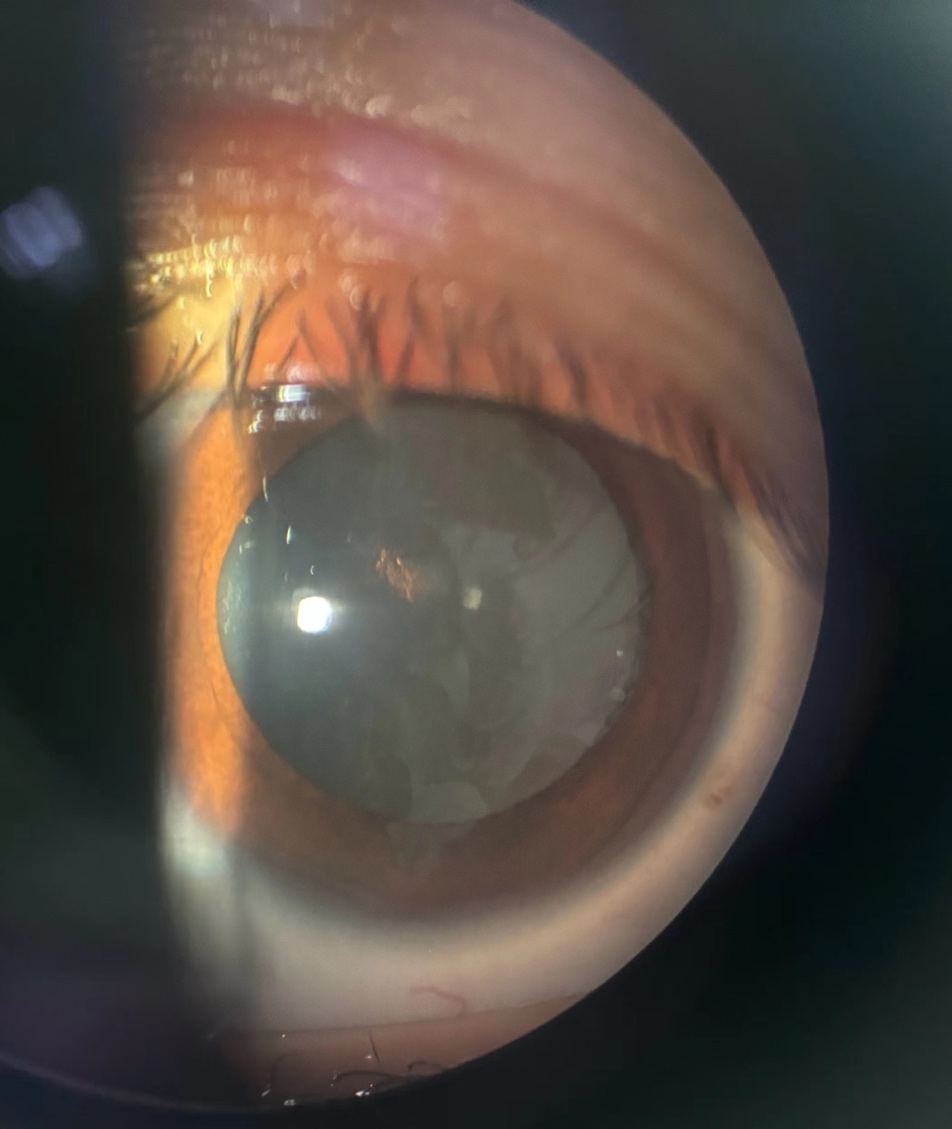
**

**Supplementary Table 1. Sequences of qRT-PCR primers.**

| Gene | Primer | Primer sequence (5’-3’) |
| --- | --- | --- |
| *OAT* | KP1011-F  KP1011-R | ACTGCCGTAAGAGGAAAAGGA  ATCCTCCTTGATCACCAGCG |
| *GAPDH* | KP0713-F  KP0713-R | AAATCAAGTGGGGCGATGCT  GATGACCCTTTTGGCTCCCC |

**Abbreviations:** qRT-PCR: quantitative real-time polymerase chain reaction
